# Supplementary material for: Enhancement of the Water Affinity of Histidine by Zinc and Copper Ions
Source: MDPI journal article supplement (doi:10.3390/ijms23073957), 2022-04-02
Supplement: s1 [file s1]

---

Supporting Information for

## Enhancement of the Water Affinity of Histidine by Zinc and Copper Ions

Yongshun Song<sup>1\*</sup>, Jing Zhan<sup>2\*</sup>, Minyue Li<sup>2</sup>, Hongwei Zhao<sup>3,4</sup>, Guosheng Shi<sup>2</sup>,  
Minghong Wu<sup>2,\*</sup>, Haiping Fang<sup>1,5,\*</sup>

<sup>1</sup>*Department of Physics, East China University of Science and Technology, Shanghai 200237, China*

<sup>2</sup>*Shanghai Applied Radiation Institute, Shanghai University, Shanghai 200444, China*

<sup>3</sup>*Zhangjiang Laboratory, Shanghai Advanced Research Institute, Chinese Academy of Sciences, Shanghai 201210, China*

<sup>4</sup>*Shanghai Institute of Applied Physics, Chinese Academy of Sciences, Shanghai 201800, China*

<sup>5</sup>*Wenzhou Institute, University of Chinese Academy of Sciences, Wenzhou 325000, China*

### Context

**PS1: Optimized geometric structures and interaction energies between Zn<sup>2+</sup> and His**

**PS2: HOMO and HOMO-1 orbitals of Zn<sup>2+</sup>–His complex**

**PS3: Electron distribution of His and Zn<sup>2+</sup>–His complex**

**PS4: Energy decomposition analysis (EDA) on the cation- $\pi$  interactions between Zn<sup>2+</sup>/Cu<sup>2+</sup> and His.**

**PS5: More optimized geometric structures and interaction energies between water molecule and His with and without Zn<sup>2+</sup> adsorption**

**PS6: Solubilities of Trp, His, and Gly in CuCl<sub>2</sub> aqueous solution.**

**PS7: UV absorption spectra of His, CuCl<sub>2</sub> and Cu<sup>2+</sup>–His**

**PS8: Spectra of the IR of His powder, Zn<sup>2+</sup>–His and Cu<sup>2+</sup>–His precipitates**

**PS9: Solubility measurement data**

---

[mhwu@mail.shu.edu.cn](mailto:mhwu@mail.shu.edu.cn); [fanghaiping@sinap.ac.cn](mailto:fanghaiping@sinap.ac.cn)

\* These authors contributed equally to this work.

---

**PS1: Optimized geometric structures and interaction energies between  $\text{Zn}^{2+}$  and His**

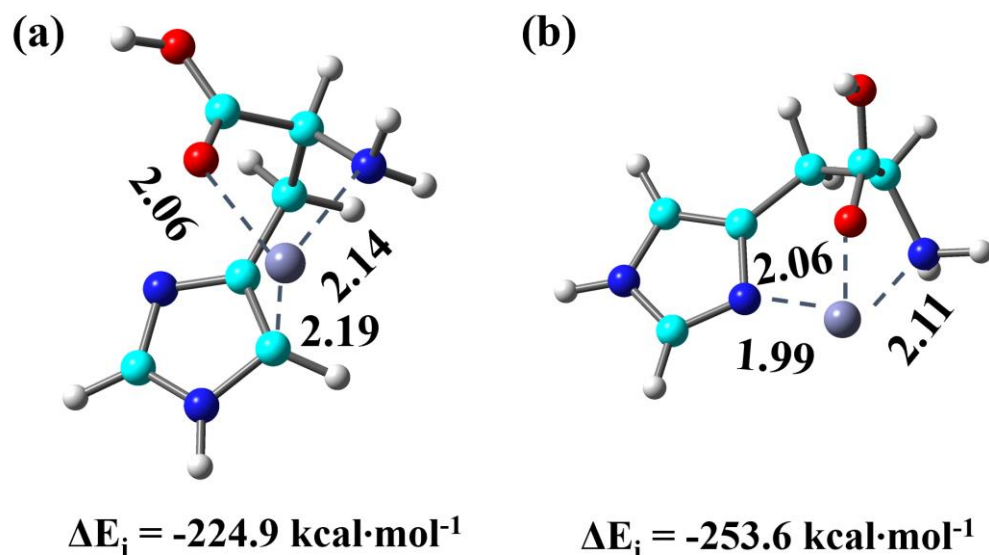

**Figure S1.** Two optimized geometric structures of  $\text{Zn}^{2+}$ –His. (a)  $\text{Zn}^{2+}$  binds to the imidazole ring in His together with amino N and the carbonyl O. The binding energy is  $-224.9 \text{ kcal}\cdot\text{mol}^{-1}$ . (b)  $\text{Zn}^{2+}$  binds to the imidazole N in His together with amino N and the carbonyl O. The binding energy is  $-253.6 \text{ kcal}\cdot\text{mol}^{-1}$ .

**PS2: HOMO and HOMO-1 orbitals of  $\text{Zn}^{2+}$ –His complex**

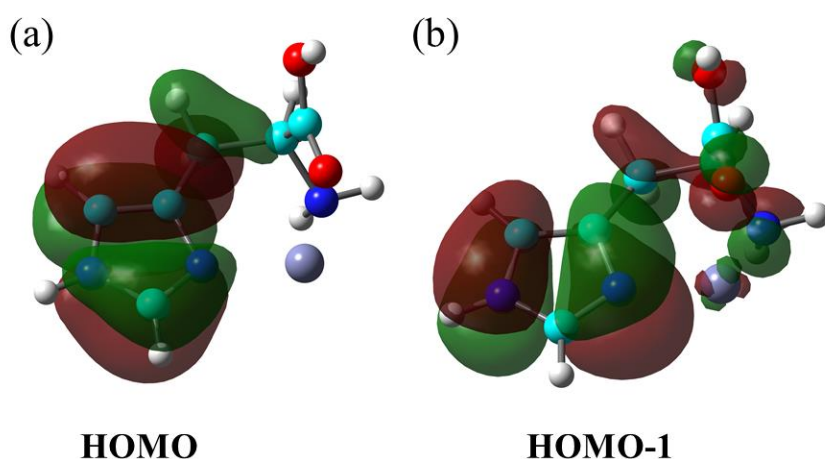

**Figure S2.** HOMO orbital (a) and HOMO-1 orbital (b) of  $\text{Zn}^{2+}$ –His with tridentate coordination configuration.

**PS3: Electron distribution of His and  $\text{Zn}^{2+}$ –His complex**

The charge values on atoms of His and  $\text{Zn}^{2+}$ -His are shown in Figure S3. It can be found that, more than one electron of His is transferred to  $\text{Zn}^{2+}$  after the adsorption of  $\text{Zn}^{2+}$ . Most of the electron transferred to  $\text{Zn}^{2+}$  comes from three regions: the  $\text{NH}_2$  region, the COOH region, and the imidazole region. At the imidazole region, it is the N-H and two C-Hs that contributing most of the electron transferred, instead of the N atom nearest to  $\text{Zn}^{2+}$ . From this point, it clearly indicates that  $\text{Zn}^{2+}$  interacts with the  $\pi$  cloud of imidazole ring.

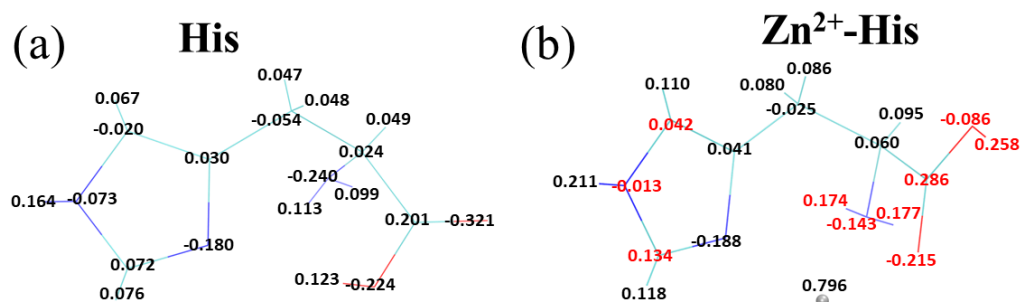

**Figure S3.** Hirshfeld charge distribution of His (a) and  $\text{Zn}^{2+}$ -His (b). The charge values that are at least 0.06e more positive than that in His is highlighted by red.

#### PS4: Energy decomposition analysis (EDA) on the cation- $\pi$ interactions between $\text{Zn}^{2+}/\text{Cu}^{2+}$ and His.

**Table S1.** EDA on the cation- $\pi$  interactions between  $\text{Zn}^{2+}/\text{Cu}^{2+}$  and His by decomposing the optimized structures of  $\text{Zn}^{2+}/\text{Cu}^{2+}$ -His into two parts. The energy unit is  $\text{kcal}\cdot\text{mol}^{-1}$ .

|                       | Pauli repulsion | Orbital interaction | Electrostatic interaction | Total energy |
|-----------------------|-----------------|---------------------|---------------------------|--------------|
| $\text{Zn}^{2+}$ -His | 88.31           | -184.03             | -209.81                   | -305.53      |
| $\text{Cu}^{2+}$ -His | 113.03          | -221.84             | -210.24                   | -319.05      |

**PS5: More optimized geometric structures and interaction energies between water molecule and His with and without  $\text{Zn}^{2+}$  adsorption**

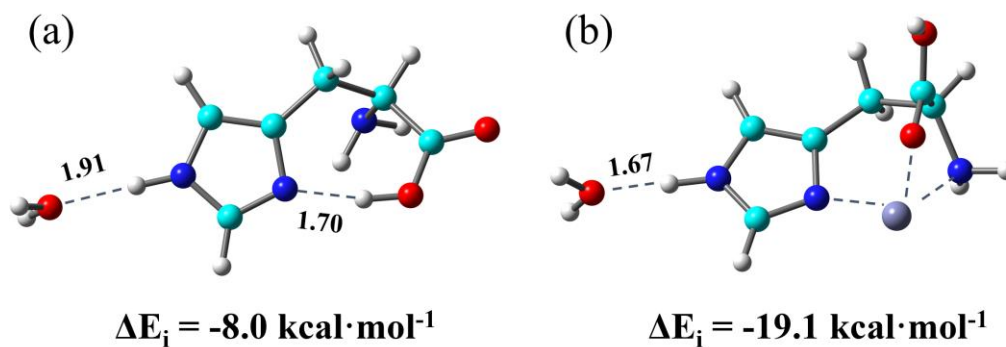

**Figure S4.** Optimized geometric structures of  $\text{H}_2\text{O}$ –His and  $\text{H}_2\text{O}$ – $\text{Zn}^{2+}$ –His. (a) Water molecule binds to the amino N of imidazole ring in His. The binding energy is  $-8.0 \text{ kcal}\cdot\text{mol}^{-1}$ . (b) Water molecule binds to the amino N of imidazole ring in  $\text{Zn}^{2+}$ –His complex. The binding energy is  $-19.1 \text{ kcal}\cdot\text{mol}^{-1}$ .

**PS6: Solubilities of Trp, His, and Gly in  $\text{CuCl}_2$  aqueous solution.**

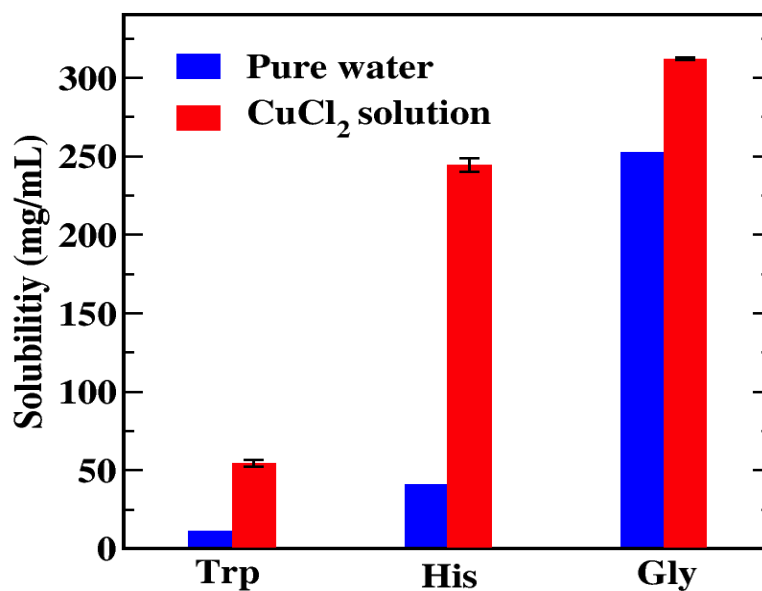

**Figure S5.** Solubilities of Trp, His, and Gly in pure water (blue bars) and 0.4 M  $\text{CuCl}_2$  aqueous solution (red bars).

**PS7: UV absorption spectra of His, CuCl<sub>2</sub> and Cu<sup>2+</sup>-His**

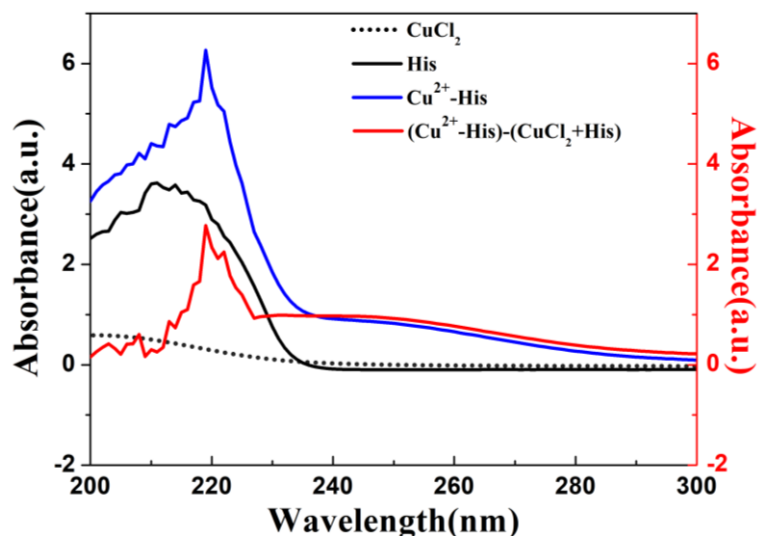

**Figure S6.** UV absorbance spectra of His (black solid line), CuCl<sub>2</sub> (black dotted line), Cu<sup>2+</sup>-His (blue line) and the difference spectrum Cu<sup>2+</sup>-His minus (His + CuCl<sub>2</sub>) (red line).

**PS8: Spectra of the IR of His powder, Zn<sup>2+</sup>-His and Cu<sup>2+</sup>-His precipitates**

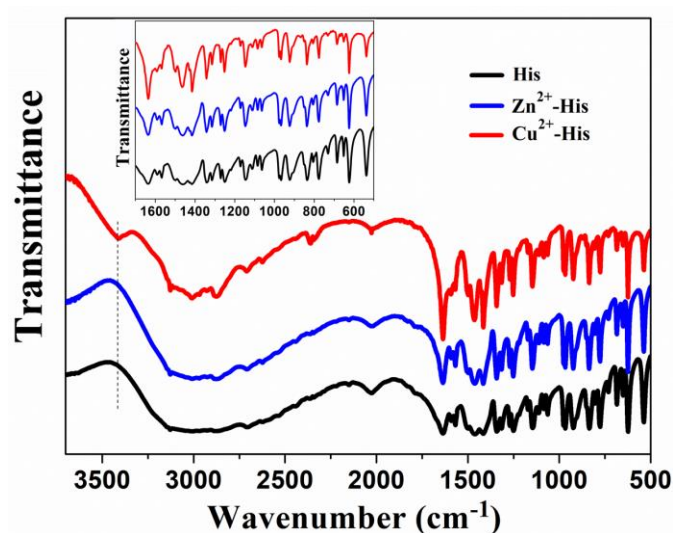

**Figure S7.** IR spectra of His powder, Zn<sup>2+</sup>-His and Cu<sup>2+</sup>-His precipitates.

---

## PS9: Solubility measurement data

**Table S2.** The *pH* values of pure water, 0.01 M, 0.05 M, 0.1 M, 0.2 M, 0.3 M, and 0.4 M ZnCl<sub>2</sub> aqueous solutions, and the solubilities of the His in those solvents.

| <b>Zn<sup>2+</sup> concentrations</b> | <b>Solubilities of His</b>  | <b><i>pH</i></b> |
|---------------------------------------|-----------------------------|------------------|
| <b>(M)</b>                            | <b>(mg·mL<sup>-1</sup>)</b> |                  |
| 0                                     | 41.07±0.32                  | 5.75±0.04        |
| 0.01                                  | 46.07±0.17                  | 5.89±0.48        |
| 0.05                                  | 72.18±0.23                  | 5.82±0.46        |
| 0.1                                   | 100.42±1.87                 | 5.65±0.43        |
| 0.2                                   | 148.96±7.67                 | 5.58±0.11        |
| 0.3                                   | 170.07±1.80                 | 5.40±0.18        |
| 0.4                                   | 233.41±12.80                | 5.24±0.22        |

**Table S3.** The *pH* values of pure water, 0.01 M, 0.05 M, 0.1 M, 0.2 M, 0.3 M, and 0.4 M CuCl<sub>2</sub> aqueous solutions, and the solubilities of His in those solvents.

| <b>Cu<sup>2+</sup> concentrations</b> | <b>Solubilities of His</b>  | <b><i>pH</i></b> |
|---------------------------------------|-----------------------------|------------------|
| <b>(M)</b>                            | <b>(mg·mL<sup>-1</sup>)</b> |                  |
| 0                                     | 41.07±0.32                  | 5.75±0.04        |
| 0.01                                  | 50.16±0.42                  | 4.46±0.21        |
| 0.05                                  | 73.02±0.41                  | 3.99±0.10        |
| 0.1                                   | 101.38±0.44                 | 3.78±0.03        |
| 0.2                                   | 150.32±0.73                 | 3.45±0.10        |
| 0.3                                   | 202.76±5.31                 | 3.26±0.11        |
| 0.4                                   | 244.44±4.50                 | 3.04±0.15        |

## References:

1. Hirshfeld, F. L., Bonded-atom fragments for describing molecular charge densities. *Theor. Chim. Acta* **1977**, 44, (2), 129-138.
